# Supplementary material for: Three-Dimensional Geometric Morphometric Analysis of Fossil Canid Mandibles and Skulls
Source: PubMed Central journal article supplement (PMC5573390; doi:10.1038/s41598-017-10232-1), 2017-08-25
Supplement: 41598_2017_10232_MOESM3_ESM.pdf [file 41598_2017_10232_MOESM3_ESM.pdf]

**Supplemental Information for: “Three-Dimensional Geometric Morphometric Analysis of Fossil Canid Mandibles and Skulls.”**

Abby Grace Drake<sup>a\*</sup>, Michael Coquerelle<sup>b</sup>, Pavel A. Kosintsev<sup>c</sup>, Olga P. Bachura<sup>c</sup>, Mikhail Sablin<sup>d</sup>, Andrei V. Gusev<sup>e</sup>, Lacey S. Fleming<sup>f</sup>, Robert J. Losey<sup>f</sup>

**Isotope Methods:**

The stable isotope analysis was conducted using a modified version of the Oxford sample preparation method<sup>1</sup>. All samples were surface cleaned with a soft brush and distilled water, and outer bone surfaces were burred off. Samples were then sonicated in several changes of distilled water. After allowing the samples to air dry, they were ground to a powder consistency in a liquid nitrogen mill. Approximately 500 mg of powder from each sample were placed in a vial with 12 mL of 1% hydrochloric acid (HCl), shaken, and allowed to demineralize. The solution was changed several times during the demineralization process, and complete demineralization of each sample was assessed visually. After demineralization, samples were centrifuged and rinsed in double-distilled water until they reached neutrality. After the demineralization process, 12 mL of .01M sodium hydroxide (NaOH) solution were added to each sample to remove humates. The vials were allowed to react, then were centrifuged and rinsed in changes of double-distilled water until they reached neutrality. Immediately following this step, another 12 mL of 1% HCl were added to sample vials. Vials were shaken and left to react, then centrifuged and rinsed with double-distilled water until neutrality. Six mL of acidulated water (pH 3) were added to each vial and shaken. The samples were then placed in a 75°C water bath and left undisturbed for 20 hours to allow the collagen to gelatinize into solution. The supernatant was filtered through a glass fiber filter paper using a 40 mm Büchner filter. Approximately 6 mL of filtrate from each sample was poured into a dual-chambered ultrafiltration vial and centrifuged until 1 mL remained in the upper chamber. This amount was pipetted into a centrifuge vial, frozen, lyophilized, then analyzed at the University of Alberta’s Biogeochemical Analytical Services Laboratory (BASL). Samples were analyzed for  $\delta^{13}\text{C}$  and  $\delta^{15}\text{N}$  ratios using a EuroVector EuroEA3028-HT elemental analyzer coupled to a GV Instruments IsoPrime continuous-flow isotope ratio mass spectrometer. BASL used NIST 8415 whole egg powder SRM as a  $\delta^{13}\text{C}$  and  $\delta^{15}\text{N}$  QA/QC check

throughout analyses. Results are reported relative to international standards, VPDB for C and AIR for N. Assessment of the validity of the collagen samples involved several quality indicators: 1) percent collagen yield by weight of the original bone sample above 1%; 2) percent carbon and nitrogen by weight above ~26% for carbon and 11% for nitrogen; 3), atomic C/N ratio values between 3.1 and 3.6<sup>2-5</sup>.

## References

1. Bronk Ramsey, C., Higham, T. F. G., Bowles, A., & Hedges, R. Improvements to the pretreatment of bone at Oxford. *Radiocarbon* **46**, 155-163 (2004).
2. Ambrose, S. H. Preparation and characterization of bone and tooth collagen for isotopic analysis. *Journal of Archaeological Science* **17**, 431-451 (1990).
3. DeNiro, M. J. Postmortem preservation and alteration of in vivo bone collagen isotope ratios in relation to palaeodietary reconstruction. *Nature* **317**, 806-809 (1985).
4. DeNiro, M. J., Weiner, S. Organic matter within crystalline aggregates of hydroxyapatite: a new substrate for stable isotopic and possibly other biogeochemical analyses of bone. *Geochimica et Cosmochimica Acta* **52**, 2415-2423 (1988).
5. Van Klinken, G. J. Bone collagen quality indicators for palaeodietary and radiocarbon measurements. *Journal of Archaeological Science* **26**, 687-695 (1999).

**Supplementary Figure S1:** 37 Osteological landmarks recorded on the mandible.

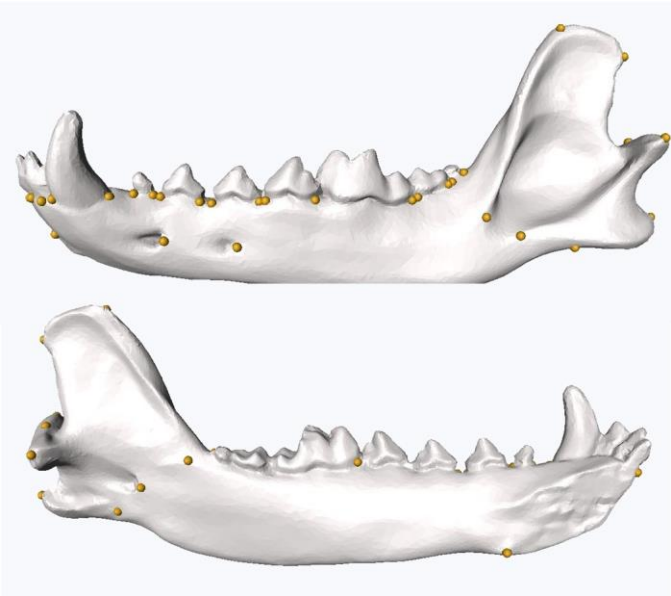

**Supplementary Figure S2:** Plot of stable carbon and nitrogen isotope values for humans, canids, and other fauna at Ust'-Polui. Red upside-down triangles: *Homo sapiens sapiens*, Black dots: *Canis sp.*, orange asterisk: *Alces alces*, purple square: *Alopex lagopus*, green plus: *Anas sp.*, pink triangle: *Lagopus lagopus*, blue circle: *Martes zibellina*, orange diamond: *Odobenus rosmarinus*, green diamonds: *Rangifer tarandus*

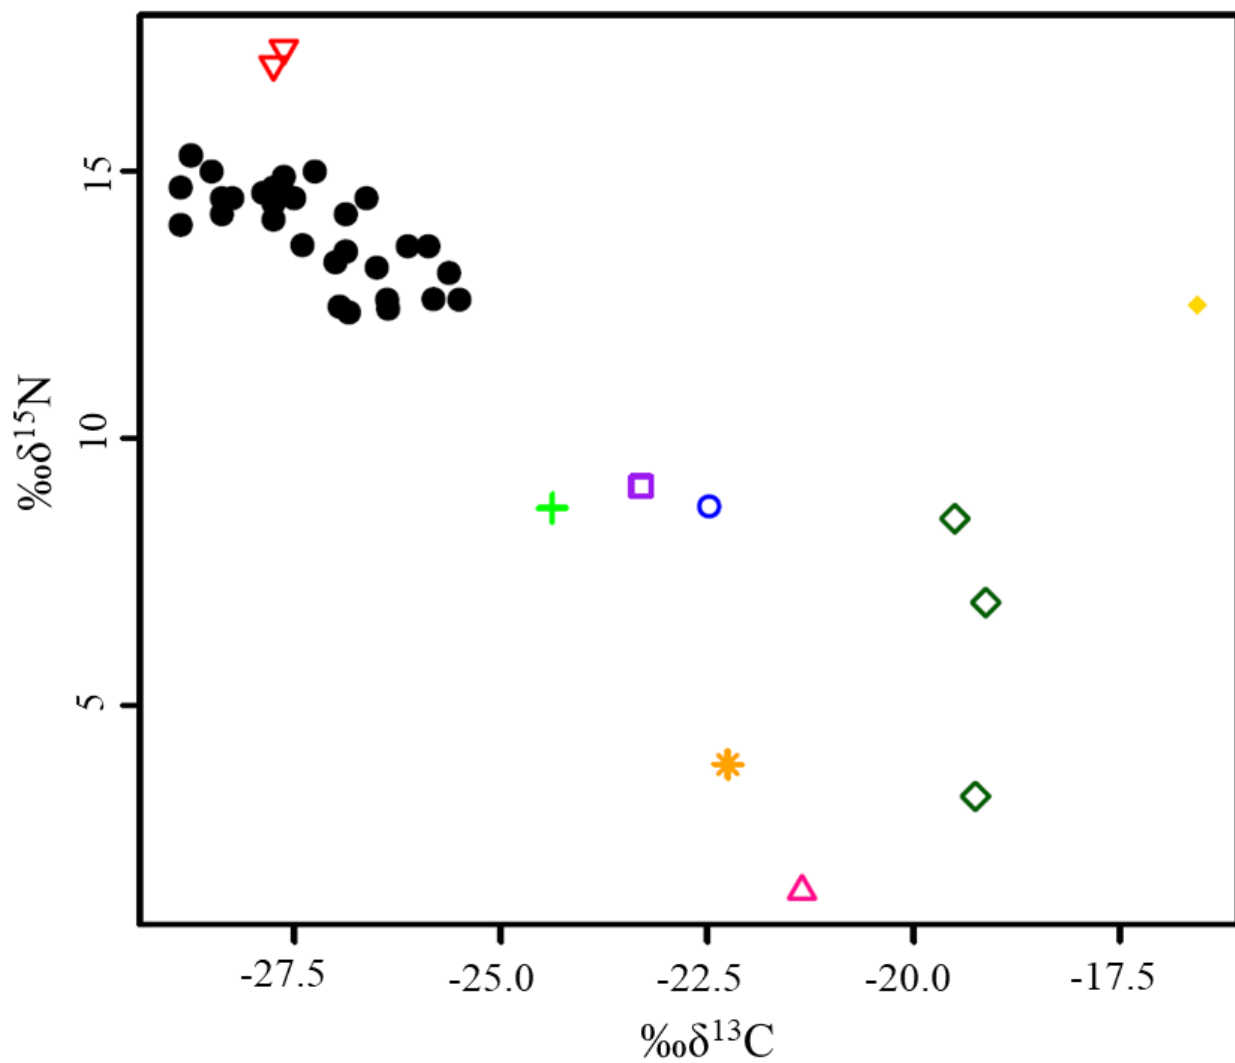

**Supplementary Video S1:** Video illustrating size and shape variation along form-space PC1 (static allometry) from the large jaws of wolves and breeds such as German Shepherds to smaller mandibles like the Fox Terrier.

**Supplementary Video S2:** Video illustrating variation along form-space PC2 from the relatively straight mandibles of wolves to the curved mandibles of dogs.

**Supplementary Table S1:** Stable carbon and nitrogen isotope values for human and faunal remains from Ust'-Polui.

| Lab ID  | Taxon                 | Element     | Sample weight (mg) | Pre-lyophilization vial weight (mg) | Post-lyophilization vial weight (mg) | Collagen yield | $\delta^{13}\text{C}$ ‰ | $\delta^{15}\text{N}$ ‰ | C content (%) | N content (%) | C/N mass  | C/N atomic |
|---------|-----------------------|-------------|--------------------|-------------------------------------|--------------------------------------|----------------|-------------------------|-------------------------|---------------|---------------|-----------|------------|
| LPO-22F | <i>Alces alces</i>    | Ph 1        | 500                | 6689.00                             | 6695.2                               | 1.2%           | -21.8                   | 3.9                     | 43.6          | 14.8          | 2.9459459 | 3.4354326  |
| LPO-18F | <i>Alopex lagopus</i> | costa       | 200                | 6642.7                              | 6646.20                              | 1.8%           | -22.64                  | 9.11                    | 43.17         | 14.37         | 3.0041754 | 3.5033372  |
| LPO-80F | <i>Anas sp.</i>       | humerus     | 300                | 6638.50                             | 6646.00                              | 2.5%           | -23.5                   | 8.7                     | 39.1          | 12.8          | 3.0546875 | 3.5622422  |
| LPO-29F | <i>Canis sp.</i>      | scapula (R) | 504                | 9369.00                             | 9377.10                              | 1.6%           | -26                     | 14.5                    | 46            | 16.3          | 2.8220859 | 3.2909925  |
| LPO-30F | <i>Canis sp.</i>      | scapula (R) | 518                | 9458.30                             | 9464.50                              | 1.2%           | -24.7                   | 13.6                    | 44.7          | 15.7          | 2.8471338 | 3.3202022  |
| LPO-31F | <i>Canis sp.</i>      | scapula (R) | 510                | 9389.20                             | 9453.90                              | 12.7%          | -24.4                   | 12.6                    | 46            | 16.1          | 2.8571429 | 3.3318744  |
| LPO-32F | <i>Canis sp.</i>      | scapula (R) | 508                | 6630.50                             | 6635.70                              | 1.0%           | -24.5                   | 13.1                    | 44.7          | 15.7          | 2.8471338 | 3.3202022  |

|         |                  |             |     |         |         |      |       |      |      |      |           |           |
|---------|------------------|-------------|-----|---------|---------|------|-------|------|------|------|-----------|-----------|
| LPO-33F | <i>Canis sp.</i> | scapula (R) | 514 | 9425    | 9430.60 | 1.1% | -26.3 | 14.6 | 43.9 | 15.1 | 2.9072848 | 3.3903476 |
| LPO-34F | <i>Canis sp.</i> | scapula (R) | 530 | 9294.30 | 9300.90 | 1.2% | -26.2 | 14.1 | 46.2 | 15.8 | 2.9240506 | 3.4098993 |
| LPO-35F | <i>Canis sp.</i> | scapula (R) | 524 | 9376.30 | 9384.10 | 1.5% | -26.2 | 14.4 | 44.3 | 15.2 | 2.9144737 | 3.398731  |
| LPO-36F | <i>Canis sp.</i> | scapula (R) | 532 | 9288.90 | 9294.20 | 1.0% | -26.1 | 14.6 | 45.6 | 15.6 | 2.9230769 | 3.4087638 |
| LPO-37F | <i>Canis sp.</i> | scapula (R) | 509 | 9428.50 | 9438.90 | 2.0% | -26.7 | 14.2 | 45.5 | 16.2 | 2.808642  | 3.2753148 |
| LPO-39F | <i>Canis sp.</i> | scapula (R) | 518 | 9434.10 | 9441.50 | 1.4% | -25.3 | 14.5 | 46   | 15.9 | 2.8930818 | 3.3737847 |
| LPO-42F | <i>Canis sp.</i> | scapula (R) | 512 | 9382.40 | 9391.30 | 1.7% | -27   | 15.3 | 46.3 | 16.5 | 2.8060606 | 3.2723045 |
| LPO-44F | <i>Canis sp.</i> | scapula (R) | 521 | 9392.10 | 9401.00 | 1.7% | -27.1 | 14.7 | 45.7 | 15.7 | 2.910828  | 3.3944796 |
| LPO-47F | <i>Canis sp.</i> | scapula (R) | 520 | 9372.10 | 9378.30 | 1.2% | -26.6 | 14.5 | 45.3 | 16   | 2.83125   | 3.3016792 |
| LPO-50F | <i>Canis sp.</i> | scapula (R) | 521 | 9387.40 | 9396.90 | 1.8% | -25.5 | 14.2 | 44.2 | 15.6 | 2.8333333 | 3.3041087 |
| LPO-51F | <i>Canis sp.</i> | scapula (R) | 538 | 9286.40 | 9294.20 | 1.4% | -25.8 | 15   | 45.7 | 16.3 | 2.803681  | 3.2695295 |
| LPO-53F | <i>Canis sp.</i> | scapula (R) | 517 | 6617.20 | 6630.20 | 2.5% | -26.8 | 15   | 44.6 | 15.7 | 2.8407643 | 3.3127744 |
| LPO-54F | <i>Canis sp.</i> | scapula (R) | 524 | 6682.10 | 6693.40 | 2.2% | -26.2 | 14.7 | 45.5 | 15.9 | 2.8616352 | 3.3371131 |
| LPO-55F | <i>Canis sp.</i> | scapula (R) | 531 | 6629.40 | 6635.60 | 1.2% | -27   | 15.3 | 43.5 | 15.1 | 2.8807947 | 3.3594561 |

|         |                  |               |     |         |         |      |        |       |       |       |           |           |
|---------|------------------|---------------|-----|---------|---------|------|--------|-------|-------|-------|-----------|-----------|
| LPO-57F | <i>Canis sp.</i> | scapula (R)   | 500 | 6619.00 | 6631.60 | 2.5% | -24.9  | 13.6  | 44.6  | 15.6  | 2.8589744 | 3.3340102 |
| LPO-58F | <i>Canis sp.</i> | scapula (R)   | 523 | 9459.80 | 9466.40 | 1.3% | -25.5  | 13.5  | 45.3  | 15.8  | 2.8670886 | 3.3434727 |
| LPO-59F | <i>Canis sp.</i> | scapula (R)   | 528 | 9459.20 | 9469.80 | 2.0% | -26.7  | 14.5  | 43.6  | 15.4  | 2.8311688 | 3.3015846 |
| LPO-62F | <i>Canis sp.</i> | scapula (R)   | 521 | 6682.70 | 6688.60 | 1.1% | -27.1  | 14    | 43.9  | 14.7  | 2.9863946 | 3.482602  |
| LPO-63F | <i>Canis sp.</i> | scapula (R)   | 519 | 6656.90 | 6671.50 | 2.8% | -26.1  | 14.9  | 42.7  | 15.1  | 2.8278146 | 3.297673  |
| LPO-64F | <i>Canis sp.</i> | parietal frag | 300 | 6678.4  | 6681.50 | 1.0% | -25.47 | 12.36 | 42.73 | 13.99 | 3.0543245 | 3.5618189 |
| LPO-65F | <i>Canis sp.</i> | parietal frag | 500 | 6625.9  | 6634.00 | 1.6% | -24.65 | 12.61 | 44.03 | 15.89 | 2.7709251 | 3.231331  |
| LPO-66F | <i>Canis sp.</i> | parietal frag | 500 | 6629    | 6638.70 | 1.9% | -25.56 | 12.47 | 41.73 | 14.29 | 2.9202239 | 3.4054367 |
| LPO-67F | <i>Canis sp.</i> | parietal frag | 500 | 6692.5  | 6699.70 | 1.4% | -25.92 | 13.62 | 44.38 | 15.36 | 2.8893229 | 3.3694013 |
| LPO-68F | <i>Canis sp.</i> | parietal frag | 500 | 6683.80 | 6691.60 | 1.6% | -25.1  | 12.6  | 45.3  | 16.1  | 2.8136646 | 3.2811719 |
| LPO-70F | <i>Canis sp.</i> | parietal frag | 500 | 6612.7  | 6619.80 | 1.4% | -25.2  | 13.2  | 45.3  | 16    | 2.83125   | 3.3016792 |
| LPO-71F | <i>Canis sp.</i> | parietal frag | 500 | 6622.20 | 6630.50 | 1.7% | -25.6  | 13.3  | 45.1  | 16    | 2.81875   | 3.2871023 |
| LPO-72F | <i>Canis sp.</i> | parietal frag | 300 | 6634.5  | 6638.90 | 1.5% | -25.09 | 12.43 | 44.92 | 15.78 | 2.8466413 | 3.3196279 |
| LPO-73F | <i>Canis sp.</i> | parietal frag | 500 | 6641.90 | 6654.80 | 2.6% | -25.5  | 13.5  | 44.3  | 15.3  | 2.8954248 | 3.3765171 |

|         |                             |            |       |         |         |      |        |      |       |       |           |           |
|---------|-----------------------------|------------|-------|---------|---------|------|--------|------|-------|-------|-----------|-----------|
| LPO-84F | <i>Homo sapiens sapiens</i> | long bone  | 1003  | 6666.3  | 6686.6  | 2.0% | -26.1  | 17.3 | 42.94 | 14.45 | 2.9716263 | 3.4653799 |
| LPO-86F | <i>Homo sapiens sapiens</i> | long bone  | 528.6 | 6677.8  | 6687.5  | 1.8% | -26.2  | 17   | 44.15 | 15.12 | 2.9199735 | 3.4051447 |
| LPO-10F | <i>Lagopus lagopus</i>      | coracoid   | 300   | 6714.60 | 6719.2  | 1.5% | -21.08 | 1.53 | 45.42 | 15.77 | 2.8801522 | 3.3587068 |
| LPO-79F | <i>Martes zibellina</i>     | tibia      | 150   | 6618.2  | 6619.80 | 1.1% | -21.98 | 8.73 | 42.49 | 13.87 | 3.0634463 | 3.5724563 |
| LPO-11F | <i>Odobenus rosmarinus</i>  | Ph 1       | 300   | 6634.6  | 6639.20 | 1.5% | -17.25 | 12.5 | 45.4  | 16.23 | 2.797289  | 3.2620754 |
| LPO-25F | <i>Rangifer tarandus</i>    | talus      | 450   | 6638.1  | 6646.80 | 1.9% | -19.3  | 6.93 | 42.96 | 15.2  | 2.8263158 | 3.2959252 |
| LPO-75F | <i>Rangifer tarandus</i>    | metacarpus | 526   | 6652.80 | 6662.50 | 1.8% | -19.6  | 8.5  | 45.9  | 15.9  | 2.8867925 | 3.3664504 |
| LPO-76F | <i>Rangifer tarandus</i>    | tibia      | 450   | 6626.00 | 6630.60 | 1.0% | -19.4  | 3.3  | 45.8  | 15.5  | 2.9548387 | 3.445803  |
